# Supplementary material for: Hysteresis-Free and Bias-Stable Organic Transistors Fabricated by Dip-Coating with a Vertical-Phase-Separation Structure
Source: MDPI journal article supplement (doi:10.3390/ma17071465), 2024-03-22
Supplement: s1 [file s1]

## Hysteresis-Free and Bias-Stable Organic Transistors with Oriented and Continuous Films Fabricated through Dip-Coating with a Vertical Phase Separation Structure

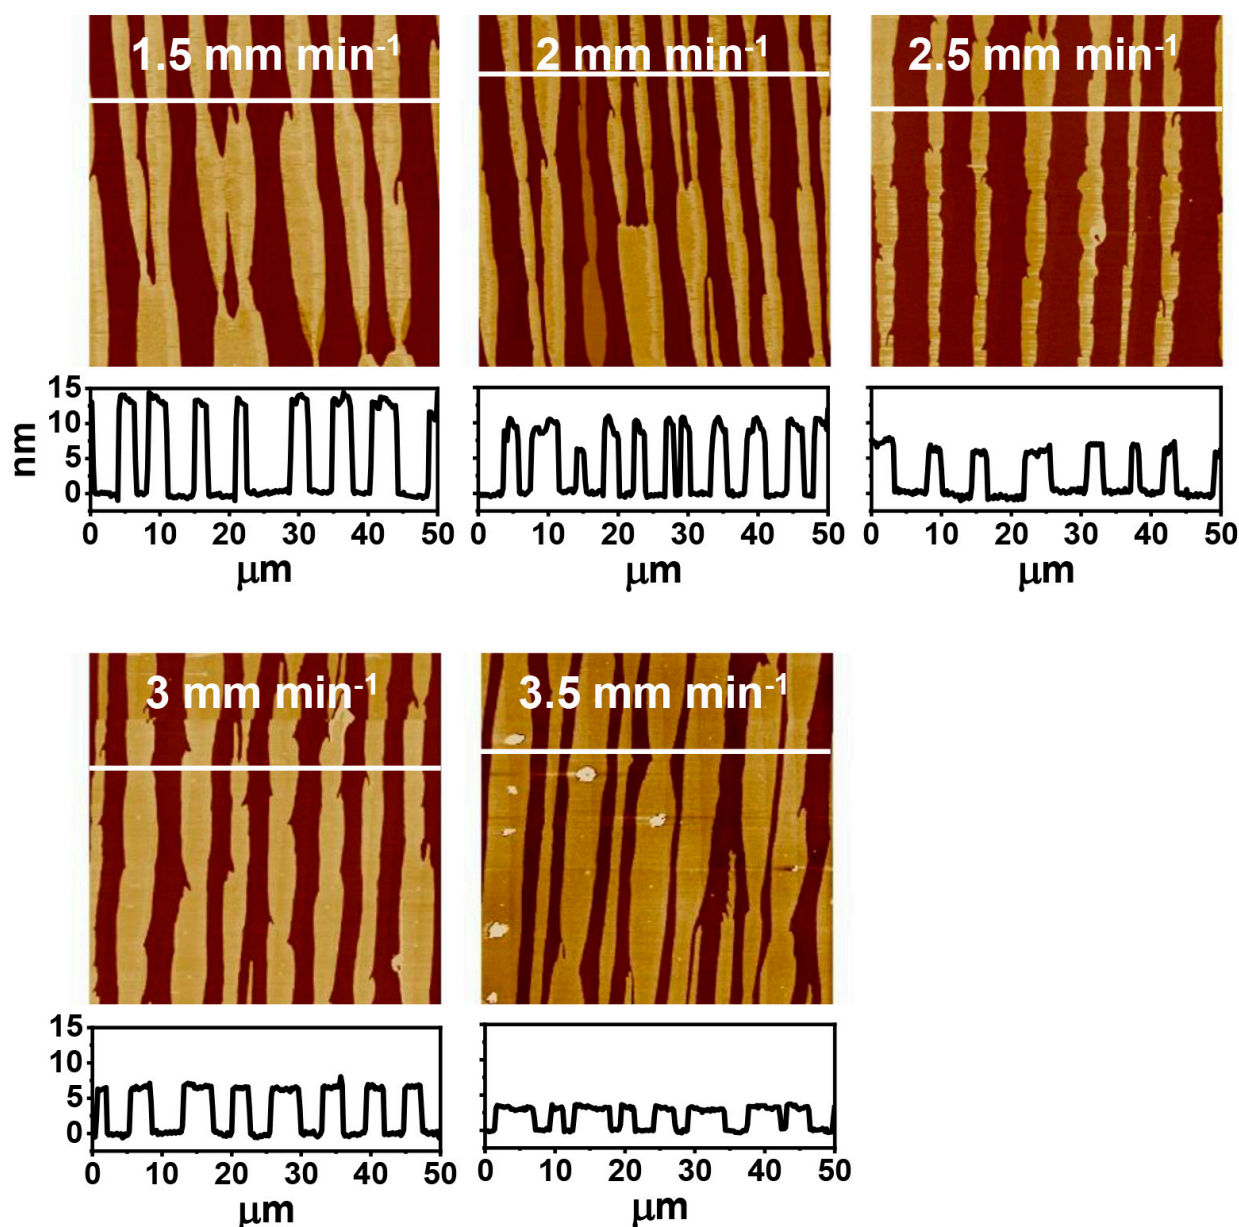

**Figure S1.** AFM images and height profiles of dip-coated DTT-8 films by varying the pulling speed with the solution concentration of 5 mg mL<sup>-1</sup>. Thickness of DTT-8 monolayer film is about 3.5 nm. With increasing the pulling speed, the thicknesses of DTT-8 strips are reduced from 4 ML of 1.5 mm min<sup>-1</sup> to 1 ML of 3.5 mm min<sup>-1</sup>.
